# Supplementary material for: Alzheimer-mutant γ-secretase complexes stall amyloid β-peptide production
Source: eLife. 2025 Feb 11;13:RP102274. doi: 10.7554/eLife.102274 (PMC11813224; doi:10.7554/eLife.102274)
Supplement: Figure 1—source data 1. [file elife-102274-fig1-data1.xlsx]

## Sheet: Fig 1
	6906	7018
62.5	0.26646	0.147766
125	0.728826	0.553792
250	1.65919	0.862924
500	5.67508	2.66516
1000	7.52447	3.98232
2000	22.8055	11.2449
		7018
	62.5	0.147766
	125	0.553792
	250	0.862924
	500	2.66516
	1000	3.98232
	2000	11.2449
	6906	6906	6906	6909	7018	7018	7018	7018
WTL	2.72382	2.74	2.71	2.7	2.66184	2.67	2.65	2.68
WTH	2.4363	2.42	2.44	2.45	2.53001	2.54	2.56	2.52
SL	0.0956971	0.0956	0.0966	0.095	0.347698	0.171998	0.523398	0.36
SF	0.266626	0.310374	0.222878	0.275	0.328543	0.373259	0.283828	0.33
GE	0.557988	0.60297	0.513006	0.56	0.817478	0.899601	0.735355	0.84
FS	4.05265	3.73604	4.36927	4.06	4.37401	3.79947	4.94855	4.5
AE	0	0	0	0	0	0	0	0
AT	0	0	0	0	0	0	0	0
	AICD 50-99	AICD 50-99	AICD 50-99	AICD 50-99	AICD 49-99	AICD 49-99	AICD 49-99	AICD 49-99
WTL	558.655	561.09	556.577	555.073	550.007	551.464	547.893	553.25
WTH	515.401	512.949	515.958	517.462	526.466	528.25	531.821	524.679
SL	96.044	96.0354	96.1239	95.9823	384.176	384.142	384.496	383.929
SF	222.341	230.084	214.598	223.823	133.347	141.332	125.362	133.607
GE	136.955	140.935	132.974	137.133	220.657	235.322	205.992	224.679
FS	446.217	418.198	474.236	446.867	855.752	753.156	958.349	878.25
AE	ND	ND	ND	ND	ND	ND	ND	ND
AT	ND	ND	ND	ND	ND	ND	ND	ND
