# Supplementary material for: Alzheimer-mutant γ-secretase complexes stall amyloid β-peptide production
Source: eLife. 2025 Feb 11;13:RP102274. doi: 10.7554/eLife.102274 (PMC11813224; doi:10.7554/eLife.102274)
Supplement: Figure 2—source data 1. [file elife-102274-fig2-data1.xlsx]

## Sheet: Fig 2 data
	ITL					WTL	WTH	WTL	WTH	WTL	WTH	WTL	WTH	stdv	stdv		ITL
Concentration(nM)	Intensity	Intensity	Intensity		ITL	69.06	71.44	63.95	55.54	55.31	57.97	74.09	47.54	8.0137	9.93374	Concentration(nM)	Intensity							Concentration(nM)	Intensity
12.5	2.85	2.56	2.705		VIV	91.48	101.11	107.58	107.5	90.54	112.9	107.22	91.05	9.47169	9.39071	12.5	2.705							12.5	2.56
25	7.47	4.52	5.995		VVIA		16.68	27.62	13.81	21	15.25	31.64	9.78	5.37268	2.97388	25	5.995							25	4.52
50	11.02	5.47	8.245		VIT	52.47	53.32	52.61	59.7	42.38	60.18	63.43	46.31	8.5964	6.51155	50	8.245							50	5.47
100	27.22	12.74	19.98		TVI	89.45	120.38	96.64	107.02	70.49	105.44	99.38	97.8	13.0248	9.38715	100	19.98							100	12.74
200	49.86	24.1	36.98		IAT	24.24	17.96	26.78	17.83	19.31	16.83	31	15.24	4.88808	1.25593	200	36.98							200	24.1
400	95.98	55.67	75.825													400	75.825							400	55.67
						SLL	SLH	SLL	SLH	SLL	SLH	SLL	SLH
	VIV				ITL	60.39	4.89	62.22	12.43	46.64	11.9	54.88	18.81				VIV
Concentration(nM)	Intensity	Intensity	Intensity		VIV	95.78		106.58	13.23	71.87	14.38	78.21	27.9			Concentration(nM)	Intensity							Concentration(nM)	Intensity
12.5	9.49	4.6	7.045		VVIA	19.42	1.73	21.86	20.1	19.27	3.45		4.89			12.5	7.045							12.5	4.6
25	22.13	14.09	18.11		VIT	45.11	6.57	50.03	18.47	41.58	13.1	51.24	25.16			25	18.11							25	14.09
50	38.26	15.39	26.825		TVI	92.34	16.97	78.1	14.38	65.59	12.69	83.43	38.98			50	26.825							50	15.39
100	74.79	41.71	58.25		IAT	26.26	0.98	23.6	2.59	19.54	3.81	25.52	6.21			100	58.25							100	41.71
200	126.84	102.41	114.625													200	114.625							200	102.41
400		224.34	224.34													400	224.34							400	224.34
	VVIA					SFL	SFH	SFL	SFH	SFL	SFH	SFL	SFH				VVIA
Concentration(nM)	Intensity	Intensity	Intensity		ITL	53.81	28.48	48.96	17.92	44.41	20.28	50.52	25.45			Concentration(nM)	Intensity							Concentration(nM)	Intensity
12.5	16.97		16.97		VIV			90.61	39.41	77.08	42.57	96.77				12.5	16.97							12.5
25	34.3	18.69	26.495		VVIA	16.4	3.24	10.64			2.01	13.66	6.04			25	26.495							25	18.69
50	69.03	46.31	57.67		VIT	49.75	52.49	37.08	39.35	42.81	29.78	40.53	34			50	57.67							50	46.31
100	158.5	89.75	124.125		TVI	76.52	22.15	72.78	21.14	78.54	24.17	84.28	36.1			100	124.125							100	89.75
200	311.87	146.15	229.01		IAT	37.38	6.33	23.69	3.64	26.78	5.54	28.35	7.3			200	229.01							200	146.15
400	639.54	306.94	473.24													400	473.24							400	306.94
	VIT																VIT
Concentration(nM)	Intensity	Intensity	Intensity			GEL	GEH	GEL	GEH	GEL	GH	GEL	GEH			Concentration(nM)	Intensity							Concentration(nM)	Intensity
12.5	2.84	2.51	2.675		ITL	48.86	6.36	38.89	14.2	29.79	11.6	38.44	16.09			12.5	2.675							12.5	2.51
25	6.25	3.03	4.64		VIV	77.23	15.25	74.78				53.22	17.26			25	4.64							25	3.03
50	10.63	6.28	8.455		VVIA	13.52	0.81	18.7		7.76		9.21	2.01			50	8.455							50	6.28
100	29.22	14.44	21.83		VIT	38.85	13.71	36.82	16.29	33.49	15.5	29.27	12.78			100	21.83							100	14.44
200	54.44	36.9	45.67		TVI	67.31	7.34	65.7	11.22	53.22		53.07	11.65			200	45.67							200	36.9
400	97.19	76.55	86.87		IAT	20.9	0.81	18.79	1.37	13.26	0.76	15.383	3.05			400	86.87							400	76.55
	TVI					FSL	FSH	FSL	FSH	FSL	FSH	FSL	FSH				TVI
Concentration(nM)	Intensity	Intensity	Intensity		ITL	53.66	61.71	45.91	66.28	39.9	60.52	50.8	57.37			Concentration(nM)	Intensity							Concentration(nM)	Intensity
12.5	6.04	3.16	4.6		VIV	63.29	60.61	63.85	54.93	77.38	67.88	78.25	67.32			12.5	4.6							12.5	3.16
25	15.53	8.92	12.225		VVIA	17.84	2.3	16.39	4.03	11.94	3.45	17.84				25	12.225							25	8.92
50	30.78	12.66	21.72		VIT	36.53	27.31	39.41	23.67	36.64	32.91	43.8	32.14			50	21.72							50	12.66
100	56.38	32.64	44.51		TVI	73.07		66.46	21.03	78.37	18.69	59.84	18.72			100	44.51							100	32.64
200	117.93	78.82	98.375		IAT	19.25	2.9	17.74	3.35	18.59	2.29	19.87	4.57			200	98.375							200	78.82
400	216.32	162.8	189.56													400	189.56							400	162.8
						AEL	AEH	AEL	AEH	AEL	AEH	AEL	AEH
	IAT				ITL	39.91	1.17	42.74	2.72	30.9	2.34	27.89	1.51				IAT
Concentration(nM)	Intensity	Intensity	Intensity		VIV		1.73	56.96	1.73	40.26			1.15			Concentration(nM)	Intensity							Concentration(nM)	Intensity
12.5	1.59	1.98	1.785		VVIA	17.25	0.58	11.51		12.65		12.37				12.5	1.785							12.5	1.98
25	4.77	3.68	4.225		VIT	43.52	16.44	32.39	3.2	28.42	7.19	27.96	6.16			25	4.225							25	3.68
50	8.87	5.64	7.255		TVI	58.96	3.16	54.52		54.65	3.45	56.38	7.33			50	7.255							50	5.64
100	20.27	7.47	13.87		IAT	23.59	0.29	12.58	0.3	17.3	0.61	12.94	0.15			100	13.87							100	7.47
200	30.71	19.59	25.15													200	25.15							200	19.59
400	74.07	54.5	64.285			ATL	ATH	ATL	ATH	ATL	ATH	ATL	ATH			400	64.285							400	54.5
					ITL	24.16	0.36	24.29	0.42	18.28		17.29	0.54
					VIV	41.11	0.29	40.28	0.29	24.48	0.29	29.04	0.58
					VVIA	14.1		11.51		7.48	0.29	7.19
					VIT	25.37		28.39	4.1	23.23	2.59	25.7	5.91
					TVI	52.64		55.09	8.34	35.09		38.35	7.48
					IAT	12.35	0.15	14.02		13.31	0.29	10.67	0.58
											Calculation
			WTL	WTH	WTL	WTH	WTL	WTH	WTL	WTH	WTL	WTH	WTL	WTH	WTL	WTH	WTL	WTH				Light				Heavy
		ITL	69.06	71.44	63.95	55.54	55.31	57.97	74.09	47.54	284.172	294.101	262.854	227.768	226.809	237.906	305.156	194.393			ITL	284.172	262.854	226.809	229.823	294.101	227.768	237.906	218.542
		VIV	91.48	101.11	107.58	107.5	90.54	112.9	107.22	91.05	137.573	153.133	163.587	163.458	136.055	172.183	163.006	136.879			VIV	137.573	163.587	136.055	163.006	153.133	163.458	172.183	136.879
		IAT	24.24	17.96	26.78	17.83	19.31	16.83	31	15.24	135.95	101.388	149.93	100.673	108.818	95.169	173.155	86.4183			IAT	87.423	100.899	108.818	96.5627	101.388	100.672	95.169	86.4183
		VIT	52.47	53.32	52.61	59.7	42.38	60.18	63.43	46.31	208.528	211.978	209.096	237.871	167.578	239.819	253.009	183.528			VIT	208.528	209.096	167.578	253.008	211.978	237.87	239.819	183.528
		TVI	89.45	120.38	96.64	107.02	70.49	105.44	99.38	97.8	160.06	217.095	173.318	192.459	125.098	189.545	178.371	175.457			TVI	140.06	125.097	143.318	123.152	132.001	140.5	123.4	115.457
		VVIA		16.68	27.62	13.81	21	15.25	31.64	9.78	0.0687373	14.2235	23.5073	11.788	17.8895	13.01	26.9187	8.36813			VVIA	0.0687373	23.5073	17.8895	26.9187	14.2235	11.788	13.01	8.36813
			SLL	SLH	SLL	SLH	SLL	SLH	SLL	SLH	SLL	SLH	SLL	SLH	SLL	SLH	SLL	SLH				Light				Heavy
		ITL	60.39	4.89	62.22	12.43	46.64	11.9	54.88	18.81	248.002	16.4622	255.636	47.9182	190.638	45.7071	225.015	74.5348			ITL	248.002	190.638	255.636	225.015	16.4622	47.9182	45.7071	74.5348
		VIV	95.78		106.58	13.23	71.87	14.38	78.21	27.9	144.521	-10.2372	161.972	11.1394	105.888	12.9976	116.132	34.8428			VIV	144.521	105.888	161.972	116.132	20.323	11.1394	12.9976	34.8428
		IAT	26.26	0.98	23.6	2.59	19.54	3.81	25.52	6.21	147.068	7.93726	132.428	16.798	110.084	23.5124	142.995	36.721			VVIA	87.423	96.5627	112.428	110.084	7.93726	16.798	23.5124	36.721
		VIT	45.11	6.57	50.03	18.47	41.58	13.1	51.24	25.16	178.658	22.2455	198.625	70.541	164.332	48.7472	203.536	97.692			VIT	178.658	164.332	198.625	203.536	22.2455	70.541	48.7472	97.692
		TVI	92.34	16.97	78.1	14.38	65.59	12.69	83.43	38.98	165.389	26.4068	139.13	21.6308	116.062	18.5145	148.959	66.9932			TVI	165.389	116.062	139.13	148.959	26.4068	21.6308	18.5145	66.9932
		VVIA	19.42	1.73	21.86	20.1	19.27	3.45		4.89	16.5487	1.53683	18.6193	17.1258	16.4214	2.99644	0.0687373	4.21843			VVIA	16.5487	16.4214	18.6193	0.068737	1.53683	17.1258	2.99644	4.21843
			SFL	SFH	SFL	SFH	SFL	SFH	SFL	SFH
		ITL	53.81	28.48	48.96	17.92	44.41	20.28	50.52	25.45	220.551	114.877	200.317	70.8219	181.335	80.6675	206.825	102.236				Light				Heavy
		VIV			90.61	39.41	77.08	42.57	96.77		-10.2372	-10.2372	136.168	53.4403	114.306	58.5461	146.121	-10.2372			ITL	220.551	181.335	200.317	206.825	114.877	70.8219	80.6675	102.236
		IAT	37.38	6.33	23.69	3.64	26.78	5.54	28.35	7.3	208.267	37.3814	132.924	22.5768	149.93	33.0336	158.57	42.7199			VIV		114.306	136.168	146.121		53.4403	58.5461
		VIT	49.75	52.49	37.08	39.35	42.81	29.78	40.53	34	197.489	208.609	146.069	155.281	169.323	116.442	160.07	133.569			IAT	87.423	100.899	108.818	96.5627	37.3814	22.5768	33.0336	42.7199
		TVI	76.52	22.15	72.78	21.14	78.54	24.17	84.28	36.1	136.217	35.9587	129.32	34.0963	139.942	39.6836	150.526	61.6825			VIT	197.489	169.323	146.069	160.07	208.609	155.281	116.442	133.569
		VVIA	16.4	3.24	10.64			2.01	13.66	6.04	13.9859	2.81823	9.09793	0.0687373	0.0687373	1.77444	11.6607	5.19433			TVI	136.217	139.942	129.32	150.526	35.9587	34.0963	39.6836	61.6825
																					VVIA	13.9859	0.068737	9.09793	11.6607	2.81823	0.068737	1.77444	5.19433
			GEL	GEH	GEL	GEH	GEL	GH	GEL	GEH
		ITL	48.86	6.36	38.89	14.2	29.79	11.6	38.44	16.09	199.9	22.5949	158.306	55.3025	120.342	44.4556	156.429	63.1873				Light				Heavy
		VIV	77.23	15.25	74.78				53.22	17.26	114.549	14.4033	110.59	-10.2372	-10.2372	-10.2372	75.7541	17.651			ITL	199.9	120.342	158.306	156.429	55.3025	44.4556	22.5949	63.1873
		IAT	20.9	0.81	18.79	1.37	13.26	0.76	15.383	3.05	117.569	7.00165	105.956	10.0837	75.5212	6.72647	87.2053	19.3297			VIV	114.549		110.59	105.754			14.4033	17.651
		VIT	38.85	13.71	36.82	16.29	33.49	15.5	29.27	12.78	153.252	51.2228	145.013	61.6936	131.499	58.4874	114.372	47.4485			IAT	117.569	75.5212	105.956	87.2053	10.0837	6.72647	7.00165	19.3297
		TVI	67.31	7.34	65.7	11.22	53.22		53.07	11.65	119.234	8.64909	116.265	15.8038	93.2517	-4.88586	92.9751	16.5967			VIT	153.252	131.499	145.013	114.372	61.6936	58.4874	51.2228	47.4485
		VVIA	13.52	0.81	18.7		7.76		9.21	2.01	11.5419	0.75611	15.9377	0.0687373	6.65394	0.0687373	7.88442	1.77444			TVI	119.234	93.2517	116.265	92.9751	15.8038		8.64909	16.5967
																					VVIA	11.5419	6.65394	15.9377	7.88442	0.068737	0.068737	0.75611	1.77444
			FSL	FSH	FSL	FSH	FSL	FSH	FSL	FSH
		ITL	53.66	61.71	45.91	66.28	39.9	60.52	50.8	57.37	219.925	253.509	187.593	272.574	162.52	248.544	207.993	235.403				Light				Heavy
		VIV	63.29	60.61	63.85	54.93	77.38	67.88	78.25	67.32	92.0249	87.6946	92.9297	78.517	114.791	99.4413	116.197	98.5364			ITL	219.925	162.52	187.593	207.993	213.509	208.544	192.574	195.403
		IAT	19.25	2.9	17.74	3.35	18.59	2.29	19.87	4.57	108.488	18.5041	100.177	20.9807	104.855	15.1469	111.9	27.6951			VIV	92.0249	114.791	92.9297	116.197	78.517	99.4413	87.6946	98.5364
		VIT	36.53	27.31	39.41	23.67	36.64	32.91	43.8	32.14	143.836	106.418	155.525	91.6449	144.283	129.145	173.341	126.02			IAT	108.488	104.855	100.177	111.9	20.9807	15.147	18.5041	27.6951
		TVI	73.07		66.46	21.03	78.37	18.69	59.84	18.72	129.855	-4.88586	117.666	33.8934	139.628	29.5785	105.459	29.6338			VIT	143.836	155.525	144.283	173.341	106.418	91.6449	129.145	126.02
		VVIA	17.84	2.3	16.39	4.03	11.94	3.45	17.84		15.2079	2.02054	13.9774	3.48863	10.2011	2.99644	15.2079	0.0687373			TVI	129.855	117.666	139.628	105.459		33.8934	29.5785	29.6338
																					VVIA	15.2079	13.9774	10.2011	15.2079	2.02054	3.48863	2.99644	0.068737
			AEL	AEH	AEL	AEH	AEL	AEH	AEL	AEH
		ITL	39.91	1.17	42.74	2.72	30.9	2.34	27.89	1.51	162.562	0.942845	174.368	7.40926	124.973	5.82395	112.416	2.36128				Light				Heavy
		VIV		1.73	56.96	1.73	40.26			1.15	-10.2372	-7.44191	81.7971	-7.44191	54.8137	-10.2372	-10.2372	-8.37906			ITL	162.562	174.368	124.973	112.415	0.942845	7.40926	5.82395	2.36129
		IAT	23.59	0.29	12.58	0.3	17.3	0.61	12.94	0.15	132.373	4.13979	71.7788	4.19483	97.7556	5.90094	73.76	3.36929			VIV	132.198	81.7971	94.8137
		VIT	43.52	16.44	32.39	3.2	28.42	7.19	27.96	6.16	172.205	62.3024	127.034	8.56859	110.922	24.7618	109.056	20.5816			IAT	102.373	71.7788	97.7556	73.76	4.13979	4.19483	5.90094	3.36929
		TVI	58.96	3.16	54.52		54.65	3.45	56.38	7.33	103.836	0.941176	95.6489	-4.88586	95.8886	1.47594	99.0787	8.63065			VIT	172.205	127.034	110.922	179.056	62.3023	8.56859	24.7618	20.5816
		VVIA	17.25	0.58	11.51		12.65		12.37		14.7072	0.56093	9.83622	0.0687373	10.8036	0.0687373	10.566	0.0687373			TVI	103.836	95.6489	95.8886	99.0787	0.941176		1.47594	8.63065
																					VVIA	14.7072	9.83622	10.8036	10.566	0.56093	0.068737	0.068737	0.068737
			ATL	ATH	ATL	ATH	ATL	ATH	ATL	ATH
		ITL	24.16	0.36	24.29	0.42	18.28		17.29	0.54	96.8544	-2.43638	97.3967	-2.18607	72.3237	-3.93826	68.1936	-1.68544				Light				Heavy
		VIV	41.11	0.29	40.28	0.29	24.48	0.29	29.04	0.58	56.1871	-9.76862	54.846	-9.76862	29.3169	-9.76862	36.6848	-9.30005			ITL	162.562	174.368	124.973	112.415
		IAT	12.35	0.15	14.02		13.31	0.29	10.67	0.58	70.5129	3.36929	79.7039	2.54375	75.7964	4.13979	61.2669	5.73583			VIV	132.198	81.7971	94.8137
		VIT	25.37		28.39	4.1	23.23	2.59	25.7	5.91	98.5442	-4.41843	110.801	12.2212	89.8592	6.09294	99.8835	19.567			IAT	102.373	71.7788	97.7556	73.76	3.36929	2.54375	4.13979	5.73583
		TVI	52.64		55.09	8.34	35.09		38.35	7.48	92.1822	-4.88586	96.7	10.4931	59.82	-4.88586	65.8315	8.90725			VIT	172.205	127.034	110.922	179.056		12.2212	6.09294	19.567
		VVIA	14.1		11.51		7.48	0.29	7.19		12.0341	0.0687373	9.83622	0.0687373	6.41633	0.314834	6.17023	0.0687373			TVI	103.836	95.6489	95.8886	99.0787		10.4931		8.90725
																					VVIA	14.7072	9.83622	10.8036	10.566	0.068737	0.068737	0.314834	0.068737

## Sheet: Fig 2 calculations
WT L												WTH
					Average						Average						Average						Average
[Aβ49] = [AICD 50-99] - [ITL]	0	35.3831	102.96	95.4272	58.4426	[Aβ48] = [AICD 49-99] - [VIT]	132.951	133.272	212.736	47.233	131.548	[Aβ49] = [AICD 50-99] - [ITL]	0	57.4127	40.1461	80.3781	44.4842	[Aβ48] = [AICD 49-99] - [VIT]	102.511	52.509	52.1842	157.623	91.2067
[Aβ46] = [ITL] - [VIV]	293.197	198.533	181.508	133.634	201.718	[Aβ45] = [VIT] - [TVI]	136.937	167.997	48.5204	259.713	153.292	[Aβ46] = [ITL] - [VIV]	281.935	128.62	131.445	163.326	176.332	[Aβ45] = [VIT] - [TVI]	159.953	194.741	232.837	136.142	180.918
[Aβ43] = [VIV] - [IAT]	100.301	125.377	54.4736	132.886	103.259	[Aβ42] = [TVI] - [VVIA]	279.982	203.18	250.857	192.467	231.622	[Aβ43] = [VIV] - [IAT]	103.491	125.571	154.028	100.921	121.003	[Aβ42] = [TVI] - [VVIA]	235.556	257.424	220.78	214.178	231.984
[Aβ40] = [IAT]	174.846	201.798	217.636	193.125	196.851	[Aβ38] = [VVIA]	0.137475	47.0146	35.779	53.8374	34.1921	[Aβ40] = [IAT]	202.776	201.345	190.338	172.837	191.824	[Aβ38] = [VVIA]	28.447	23.576	26.02	16.7363	23.6948
Sum	568.344	561.09	556.577	555.073	568.344	Sum	550.007	551.464	547.893	553.25	550.007	Sum	588.202	512.949	515.958	517.462	588.202	Sum	526.466	528.25	531.821	524.679	526.466
S169L												S170F
					Average						Average						Average						Average
[Aβ49] = [AICD 50-99] - [ITL]	63.1195	0.198938	4.70963	-53.0874	3.73518	[Aβ48] = [AICD 49-99] - [VIT]	339.685	243.06	287.001	188.545	264.573	[Aβ49] = [AICD 50-99] - [ITL]	0	88.4402	53.2628	19.3508	40.2635	[Aβ48] = [AICD 49-99] - [VIT]	0	0	0	0	0
[Aβ46] = [ITL] - [VIV]	0	73.5576	65.4191	79.3841	54.5902	[Aβ45] = [VIT] - [TVI]	0	97.8203	60.4654	61.3976	54.9208	[Aβ46] = [ITL] - [VIV]	229.754	34.7631	44.2427	204.472	128.308	[Aβ45] = [VIT] - [TVI]	345.301	242.37	153.517	143.772	221.24
[Aβ43] = [VIV] - [IAT]	24.7715	0	0	0	6.19287	[Aβ42] = [TVI] - [VVIA]	49.7399	9.01014	31.0361	125.549	53.8339	[Aβ43] = [VIV] - [IAT]	24.7715	0	0	0	6.19287	[Aβ42] = [TVI] - [VVIA]	66.2809	68.055	75.8183	112.976	80.7826
[Aβ40] = [IAT]	15.8745	33.596	47.0248	73.4419	42.4843	[Aβ38] = [VVIA]	3.07366	34.2515	5.99287	8.43686	12.9387	[Aβ40] = [IAT]	74.7628	45.1535	66.0671	85.4397	67.8558	[Aβ38] = [VVIA]	5.63646	0.137474	3.54888	10.3887	4.92787
Sum	103.766	107.353	117.153	99.7387	103.766	Sum	392.498	384.142	384.496	383.929	392.498	Sum	329.288	168.357	163.573	309.263	329.288	Sum	417.218	310.563	232.884	267.137	417.218
G378E												F386S
					Average						Average						Average						Average
[Aβ49] = [AICD 50-99] - [ITL]	26.3498	52.0242	87.7842	10.7581	44.2291	[Aβ48] = [AICD 49-99] - [VIT]	97.2696	118.347	103.546	129.782	112.236	[Aβ49] = [AICD 50-99] - [ITL]	19.1999	1.11006	89.0879	56.0621	41.365	[Aβ48] = [AICD 49-99] - [VIT]	642.917	569.866	700.059	626.21	634.763
[Aβ46] = [ITL] - [VIV]	110.605	88.9111	16.3832	91.0727	76.743	[Aβ45] = [VIT] - [TVI]	91.7796	116.975	85.1474	61.7035	88.9013	[Aβ46] = [ITL] - [VIV]	269.983	218.205	209.759	193.732	222.92	[Aβ45] = [VIT] - [TVI]	212.835	115.503	199.133	192.772	180.061
[Aβ43] = [VIV] - [IAT]	0	0	14.8033	0	3.70082	[Aβ42] = [TVI] - [VVIA]	31.4701	0	15.786	29.6446	19.2252	[Aβ43] = [VIV] - [IAT]	115.073	168.589	138.381	141.683	140.931	[Aβ42] = [TVI] - [VVIA]	0	60.8096	53.164	59.1301	43.2759
[Aβ40] = [IAT]	20.1673	13.4529	14.0033	38.6593	21.5707	[Aβ38] = [VVIA]	0.137474	0.137474	1.51222	3.54888	1.33401	[Aβ40] = [IAT]	41.9615	30.2939	37.0083	55.3902	41.1635	[Aβ38] = [VVIA]	4.04107	6.97726	5.99287	0.137474	4.28717
Sum	157.122	154.388	132.974	140.49	157.122	Sum	220.657	235.459	205.992	224.679	220.657	Sum	446.217	418.198	474.236	446.867	446.217	Sum	859.793	753.156	958.349	878.25	859.793
A431E												A434T
																	Average						Average
[Aβ49] = [AICD 50-99] - [ITL]	ND	ND	ND	ND	ND	[Aβ48] = [AICD 49-99] - [VIT]	ND	ND	ND	ND	ND	[Aβ49] = [AICD 50-99] - [ITL]	ND	ND	ND	ND	ND	[Aβ48] = [AICD 49-99] - [VIT]	ND	ND	ND	ND	ND
[Aβ46] = [ITL] - [VIV]	1.88569	14.8185	11.6479	4.72257	8.26867	[Aβ45] = [VIT] - [TVI]	122.722	17.1372	46.5717	23.9018	52.5833	[Aβ46] = [ITL] - [VIV]	0	0	0	0	0	[Aβ45] = [VIT] - [TVI]	0	3.4562	12.1859	21.3194	9.24038
[Aβ43] = [VIV] - [IAT]	-8.27958	-8.38965	-11.8019	-6.73858	-8.80242	[Aβ42] = [TVI] - [VVIA]	0.760492	-0.137474	2.8144	17.1238	5.14031	[Aβ43] = [VIV] - [IAT]	-6.73858	-5.08751	-8.27958	-11.4717	-7.89433	[Aβ42] = [TVI] - [VVIA]	-0.137474	20.8487	-0.629668	17.677	9.43965
[Aβ40] = [IAT]	8.27958	8.38965	11.8019	6.73858	8.80242	[Aβ38] = [VVIA]	1.12186	0.137474	0.137474	0.137474	0.383571	[Aβ40] = [IAT]	6.73858	5.08751	8.27958	11.4717	7.89433	[Aβ38] = [VVIA]	0.137474	0.137474	0.629668	0.137474	0.260523
Sum	ND	ND	ND	ND	ND	Sum	ND	ND	ND	ND	ND	Sum	ND	ND	ND	ND	ND	Sum	ND	ND	ND	ND	ND
	AICD 50-99 or Aβ49 production	AICD 50-99 or Aβ49 production	AICD 50-99 or Aβ49 production	AICD 50-99 or Aβ49 production	AICD 49-99 or Aβ48 production	AICD 49-99 or Aβ48 production	AICD 49-99 or Aβ48 production	AICD 49-99 or Aβ48 production				WT	Light				Heavy
WTL	558.655	561.09	556.577	555.073	550.007	551.464	547.893	553.25				ITL	284.172	262.854	226.809	229.823	294.101	227.768	237.906	218.542
WTH	515.401	512.949	515.958	517.462	526.466	528.25	531.821	524.679				VIV	137.573	163.587	136.055	163.006	153.133	163.458	172.183	136.879
SL	96.044	96.0354	96.1239	95.9823	384.176	384.142	384.496	383.929				IAT	87.423	100.899	108.818	96.5627	101.388	100.672	95.169	86.4183
SF	222.341	230.084	214.598	223.823	133.347	141.332	125.362	133.607				VIT	208.528	209.096	167.578	253.008	211.978	237.87	239.819	183.528
GE	136.955	140.935	132.974	137.133	220.657	235.322	205.992	224.679				TVI	140.06	125.097	143.318	123.152	132.001	140.5	123.4	115.457
FS	446.217	418.198	474.236	446.867	855.752	753.156	958.349	878.25				VVIA	0.0687373	23.5073	17.8895	26.9187	14.2235	11.788	13.01	8.36813
AE	ND	ND	ND	ND	ND	ND	ND	ND				ITL	568.344	525.707	453.617	459.645	588.202	455.536	475.811	437.084
AT	ND	ND	ND	ND	ND	ND	ND	ND				VIV	275.147	327.175	272.109	326.011	306.267	326.916	344.366	273.757
												IAT	174.846	201.798	217.636	193.125	202.776	201.345	190.338	172.837
SL	Heavy											VIT	417.056	418.192	335.157	506.017	423.955	475.741	479.637	367.056
ITL	16.4622	47.9182	45.7071	74.5348	32.9245	95.8365	91.4143	149.07				TVI	280.119	250.195	286.636	246.304	264.003	281	246.8	230.914
VIV	20.323	11.1394	12.9976	34.8428	40.646	22.2789	25.9952	69.6856				VVIA	0.137475	47.0146	35.779	53.8374	28.447	23.576	26.02	16.7363
IAT	7.93726	16.798	23.5124	36.721	15.8745	33.596	47.0248	73.4419
VIT	22.2455	70.541	48.7472	97.692	44.4911	141.082	97.4943	195.384
TVI	26.4068	21.6308	18.5145	66.9932	52.8136	43.2617	37.029	133.986
VVIA	1.53683	17.1258	2.99644	4.21843	3.07366	34.2515	5.99287	8.43686
SF	Heavy
ITL	114.877	70.8219	80.6675	102.236	229.754	141.644	161.335	204.472
VIV		53.4403	58.5461		0	106.881	117.092	0
IAT	37.3814	22.5768	33.0336	42.7199	74.7628	45.1535	66.0671	85.4397
VIT	208.609	155.281	116.442	133.569	417.218	310.563	232.884	267.137
TVI	35.9587	34.0963	39.6836	61.6825	71.9174	68.1925	79.3671	123.365
VVIA	2.81823	0.068737	1.77444	5.19433	5.63646	0.137474	3.54888	10.3887
GE	Heavy
ITL	55.3025	44.4556	22.5949	63.1873	110.605	88.9111	45.1898	126.375
VIV			14.4033	17.651	0	0	28.8066	35.302
IAT	10.0837	6.72647	7.00165	19.3297	20.1673	13.4529	14.0033	38.6593
VIT	61.6936	58.4874	51.2228	47.4485	123.387	116.975	102.446	94.8969
TVI	15.8038		8.64909	16.5967	31.6076	0	17.2982	33.1934
VVIA	0.068737	0.068737	0.75611	1.77444	0.137474	0.137474	1.51222	3.54888
FS	Heavy
ITL	213.509	208.544	192.574	195.403	427.017	417.088	385.148	390.805
VIV	78.517	99.4413	87.6946	98.5364	157.034	198.883	175.389	197.073
IAT	20.9807	15.147	18.5041	27.6951	41.9615	30.2939	37.0083	55.3902
VIT	106.418	91.6449	129.145	126.02	212.835	183.29	258.29	252.04
TVI		33.8934	29.5785	29.6338	0	67.7868	59.1569	59.2676
VVIA	2.02054	3.48863	2.99644	0.068737	4.04107	6.97726	5.99287	0.137474
AE	Heavy
ITL	0.942845	7.40926	5.82395	2.36129	1.88569	14.8185	11.6479	4.72257
VIV					0	0	0	0
IAT	4.13979	4.19483	5.90094	3.36929	8.27958	8.38965	11.8019	6.73858
VIT	62.3023	8.56859	24.7618	20.5816	124.605	17.1372	49.5235	41.1631
TVI	0.941176		1.47594	8.63065	1.88235	0	2.95187	17.2613
VVIA	0.56093	0.068737	0.068737	0.068737	1.12186	0.137474	0.137474	0.137474
AT	Heavy
ITL					0	0	0	0
VIV					0	0	0	0
IAT	3.36929	2.54375	4.13979	5.73583	6.73858	5.08751	8.27958	11.4717
VIT		12.2212	6.09294	19.567	0	24.4424	12.1859	39.1339					*P<0.05
TVI		10.4931		8.90725	0	20.9862	0	17.8145					**P<0.01
VVIA	0.068737	0.068737	0.314834	0.068737	0.137474	0.137474	0.629668	0.137474					***P<0.001
Aβ49->Aβ46						Aβ48->Aβ45						Aβ49->Aβ46			Aβ48->Aβ45
WTL	101.734	93.6939	81.5012	82.8082	89.9344	WTL	75.8274	75.8331	61.1719	91.4626	76.0737	SL	0.19762		SL	0.0049644	**
WTH	114.125	88.8073	92.2191	84.4668	94.9046	WTH	80.5285	90.0598	90.1876	69.9583	82.6835	SF	0.209675		SF	1.83529e-06	***
SL	94.2806	99.7929	95.1004	95.3096	96.1209	SL	11.5809	36.7266	25.3564	50.8906	31.1386	GE	0.209675		GE	0.00771813	**
SF	83.334	81.5618	75.1802	91.3544	82.8576	SF	242.882	219.74	235.769	219.942	229.583	FS	0.850203		FS	0.000209482	***
GE	80.7602	63.0865	63.984	62.155	67.4964	GE	55.9181	49.7085	49.7328	42.2368	49.3991	AE	ND		AE	ND
FS	95.6972	99.7346	81.2144	87.4544	91.0252	FS	24.8711	24.3362	26.9516	28.698	26.2142	AT	ND		AT	ND
AE	ND	ND	ND	ND	ND	AE	ND	ND	ND	ND	ND
AT	ND	ND	ND	ND	ND	AT	ND	ND	ND	ND	ND
Aβ46->Aβ43						Aβ45->Aβ42						Aβ46->Aβ43			Aβ45->Aβ42
WTL	48.4121	62.2351	59.9866	70.9267	60.3901	WTL	67.1659	59.8277	75.5231	58.6751	65.2979	SL	0.345775		SL	0.785956
WTH	52.0683	71.7652	72.3746	62.6327	64.7102	WTH	62.2713	59.0658	51.4556	62.9098	58.9256	SF	0.123882		SF	0.000161529	***
SL	53.4522	53.2468	58.4367	56.747	55.4707	SL	58.706	60.6642	67.9806	68.5759	63.9817	GE	0.108817		GE	0.000526672	***
SF		75.4574	72.5771		74.0172	SF	27.2373	26.9577	34.0801	31.1804	29.8639	FS	0.0189214	*	FS	0.000579827	***
GE			43.7458	47.9344	45.8401	GE	25.6166		21.8852	29.9784	25.8267	AE	ND		AE	0.000134838	***
FS	41.7747	47.6836	45.5381	45.4274	45.1059	FS		30.9834	25.9033	28.5152	27.8006	AT	ND		AT	0.955666
AE	0	0	0	0	0	AE	15.5107		15.9605	17.9339	16.4684
AT	0	0	0	0	0	AT		70.8598		60.5219	65.6908
Aβ43->Aβ40						Aβ42->Aβ48						Aβ43->Aβ40			Aβ42->Aβ48
WTL	63.5464	61.6789	79.981	59.2389	66.1113	WTL	14.0491	14.7912	12.4824	11.8581	13.2952	SL	0.000708329	***	SL	1.18066e-05	***
WTH	66.209	61.5892	55.2719	63.1349	61.5513	WTH	10.7753	8.39005	10.543	7.24782	9.23903	SF	0.112944		SF	0.000335765	***
SL	109.056	130.798	130.898	105.39	119.035	SL	25.8198	29.1729	26.1843	26.2968	26.8685	GE	0.14076		GE	0.00385006	**
SF		42.2467	56.4231		49.3349	SF	7.83741	4.2016	4.47147	4.42108	5.23289	FS	0.000232967	***	FS	0.00193129	**
GE			78.6114	79.5103	79.0609	GE	4.43494		8.74208	6.69151	6.62284	AE	ND		AE	0.00258716	**
FS	26.7213	15.2321	21.1006	28.1064	22.7901	FS		7.29294	8.13047	5.23196	6.88512	AT	ND		AT	0.000247339	***
AE	0	0	0	0	0	AE	19.5988		24.6572	20.7964	21.6842
AT	0	0	0	0	0	AT		0.655069		0.771697	0.713383
