# Supplementary material for: Alzheimer-mutant γ-secretase complexes stall amyloid β-peptide production
Source: eLife. 2025 Feb 11;13:RP102274. doi: 10.7554/eLife.102274 (PMC11813224; doi:10.7554/eLife.102274)
Supplement: Figure 3—source data 1. [file elife-102274-fig3-data1.xlsx]

## Sheet: Fig 3
																		Software Version	3.02.1
Software Version	3.02.1
																		Experiment File Path:	C:\Users\mdcm_wolfe_lab\Desktop\Parnian\First set of DIAN mutations\AB42 first.xpt
Experiment File Path:	C:\Users\mdcm_wolfe_lab\Desktop\Parnian\First set of DIAN mutations\AB 40 first.xpt																	Protocol File Path:	C:\Users\Public\Documents\Protocols\Sujan_42 new.prt
Protocol File Path:	C:\Users\Public\Documents\Protocols\sujan.prt																	Plate Number	Plate 1
Plate Number	Plate 1																	Date	2023-03-23
Date	2023-03-23																	Time	17:01:19
Time	17:31:18																	Reader Type:	Epoch 2
Reader Type:	Epoch 2																	Reader Serial Number:	161216A
Reader Serial Number:	161216A																	Reading Type	Reader
Reading Type	Reader
																		Procedure Details
Procedure Details																		Plate Type	96 WELL PLATE
Plate Type	96 WELL PLATE																	Eject plate on completion
Eject plate on completion																		Read	Absorbance Endpoint
Read	Absorbance Endpoint																		Full Plate
	Full Plate																		Wavelengths: 450
	Wavelengths: 450																		Read Speed: Normal, Delay: 100 msec, Measurements/Data Point: 8
	Read Speed: Normal, Delay: 100 msec, Measurements/Data Point: 8
																		Layout
Layout
																				1	2	3	4	5	6	7	8	9	10	11	12
		1	2	3	4	5	6	7	8	9	10	11	12						A	STD8	SPL1	SPL1	SPL1	SPL1	BLK	BLK	SPL25	SPL33	SPL33	SPL41	SPL41	Well ID
	A	STD1	SPL1	SPL1	SPL1	SPL1	BLK	BLK	SPL25	SPL33	SPL33	SPL41	SPL41	Well ID						0												Conc/Dil
		0												Conc/Dil					B	STD7	SPL2	SPL2	SPL2	SPL2	SPL18	SPL26	SPL26	SPL34	SPL34	SPL42	SPL42	Well ID
	B	STDB1	SPL2	SPL2	SPL2	SPL2	SPL18	SPL26	SPL26	SPL34	SPL34	SPL42	SPL42	Well ID						15.63												Conc/Dil
		7.81												Conc/Dil					C	STD6	SPL3	SPL3	SPL3	SPL3	SPL19	SPL27	SPL27	SPL35	SPL35	SPL43	SPL43	Well ID
	C	STD2	SPL3	SPL3	SPL3	SPL3	SPL19	SPL27	SPL27	SPL35	SPL35	SPL43	SPL43	Well ID						31.25												Conc/Dil
		15.63												Conc/Dil					D	STD5	SPL4	SPL4	SPL4	SPL4	SPL20	SPL28	SPL28	SPL36	SPL36	SPL44	SPL44	Well ID
	D	STD3	SPL4	SPL4	SPL4	SPL4	SPL20	SPL28	SPL28	SPL36	SPL36	SPL44	SPL44	Well ID						62.5												Conc/Dil
		31.25												Conc/Dil					E	STD4	SPL5	SPL5	SPL5	SPL5	SPL21	SPL29	SPL29	SPL37	SPL37	SPL45	SPL45	Well ID
	E	STD4	SPL5	SPL5	SPL5	SPL5	SPL21	SPL29	SPL29	SPL37	SPL37	SPL45	SPL45	Well ID						125												Conc/Dil
		62.5												Conc/Dil					F	STD3	SPL6	SPL6	SPL6	SPL6	SPL22	SPL30	SPL30	SPL38	SPL38	SPL46	SPL46	Well ID
	F	STD5	SPL6	SPL6	SPL6	SPL6	SPL22	SPL30	SPL30	SPL38	SPL38	SPL46	SPL46	Well ID						250												Conc/Dil
		125												Conc/Dil					G	STD2	SPL7	SPL7	SPL7	SPL7	SPL23	SPL31	SPL31	SPL39	SPL39	SPL47	SPL47	Well ID
	G	STD6	SPL7	SPL7	SPL7	SPL7	SPL23	SPL31	SPL31	SPL39	SPL39	SPL47	SPL47	Well ID						500												Conc/Dil
		250												Conc/Dil					H	STD1	SPL8	SPL8	SPL8	SPL8	SPL24	SPL32	SPL32	SPL40	SPL40	SPL48	SPL48	Well ID
	H	STD7	SPL8	SPL8	SPL8	SPL8	SPL24	SPL32	SPL32	SPL40	SPL40	SPL48	SPL48	Well ID						1000												Conc/Dil
		500												Conc/Dil
																		Results
Results																		Actual Temperature:	24.9
Actual Temperature:	23.5
																			Column1	1	2	3	4	5	6	7	8	9	10	11	12	Column2
		1	2	3	4	5	6	7	8	9	10	11	12						A	0.098	0.351593	0.356835	0.353114	0.344277	0	0	0	0	0	0	0	450
	A	0.113	0.819906	0.783418	0.850973	0.806888	0	0	0	0	0	0	0	450
																				<0.000	221.8	225	222.73	217.308	<0.000	<0.000	<0.000	<0.000	<0.000	<0.000	<0.000	[Concentration]
		<0.000	227.4	221.2	232.6	225.2	<0.000	<0.000	<0.000	<0.000	<0.000	<0.000	<0.000	[Concentration]					B	0.103	0.354211	0.356261	0.350776	0.347528	0	0	0	0	0	0	0	450
	B	0.109	0.817534	0.781086	0.848569	0.80453	0	0	0	0	0	0	0	450
																				<0.000	223.4	224.65	221.3	219.308	<0.000	<0.000	<0.000	<0.000	<0.000	<0.000	<0.000	[Concentration]
		<0.000	227	220.8	232.2	224.8	<0.000	<0.000	<0.000	<0.000	<0.000	<0.000	<0.000	[Concentration]					C	0.125	0.174954	0.177491	0.179823	0.172269	0	0	0	0	0	0	0	450
	C	0.111	0.147195	0.146015	0.147751	0.146561	0	0	0	0	0	0	0	450
																				42.714	97.12	99.36	101.396	94.72	<0.000	<0.000	<0.000	<0.000	<0.000	<0.000	<0.000	[Concentration]
		<0.000	54.46	53.6	54.86	54	<0.000	<0.000	<0.000	<0.000	<0.000	<0.000	<0.000	[Concentration]					D	0.144	0.150805	0.152411	0.151919	0.149681	0	0	0	0	0	0	0	450
	D	0.125	0.189648	0.191277	0.194764	0.188207	0	0	0	0	0	0	0	450
																				66.77	74.16	75.8	75.3	73	<0.000	<0.000	<0.000	<0.000	<0.000	<0.000	<0.000	[Concentration]
		34.614	78.64	79.4	81	77.96	<0.000	<0.000	<0.000	<0.000	<0.000	<0.000	<0.000	[Concentration]					E	0.22	0.115036	0.115432	0.115776	0.114207	0	0	0	0	0	0	0	450
	E	0.162	0.117814	0.118075	0.118598	0.117497	0	0	0	0	0	0	0	450
																				132.91	28.5	29.2	29.8	27	<0.000	<0.000	<0.000	<0.000	<0.000	<0.000	<0.000	[Concentration]
		64.127	22.46	23	24.04	21.78	<0.000	<0.000	<0.000	<0.000	<0.000	<0.000	<0.000	[Concentration]					F	0.388	0.270085	0.269555	0.274641	0.263056	0	0	0	0	0	0	0	450
	F	0.32	0.293336	0.296925	0.30163	0.288696	0	0	0	0	0	0	0	450
																				242.82	169.52	169.16	172.6	164.72	<0.000	<0.000	<0.000	<0.000	<0.000	<0.000	<0.000	[Concentration]
		124.546	116.72	117.8	119.2	115.308	<0.000	<0.000	<0.000	<0.000	<0.000	<0.000	<0.000	[Concentration]					G	0.855	0.117678	0.117192	0.116713	0.118671	0	0	0	0	0	0	0	450
	G	0.959	0.117	0.116	0	0	0	0	0	0	0	0	0	450
																				502.488	33	32.2	31.4	34.6	<0.000	<0.000	<0.000	<0.000	<0.000	<0.000	<0.000	[Concentration]
		250.049	<0.000	<0.000	<0.000	<0.000	<0.000	<0.000	<0.000	<0.000	<0.000	<0.000	<0.000	[Concentration]					H	1.61	0.138786	0.139347	0.141264	0.136234	0	0	0	0	0	0	0	450
	H	2.557	0.058	0.085	0	0	0	0	0	0	0	0	0	450
																				999.44	61.16	61.8	63.96	58.2	<0.000	<0.000	<0.000	<0.000	<0.000	<0.000	<0.000	[Concentration]
		499.995	<0.000	<0.000	<0.000	<0.000	<0.000	<0.000	<0.000	<0.000	<0.000	<0.000	<0.000	[Concentration]
																		StdCurve
StdCurve
																		StdCurve Fitting Results
StdCurve Fitting Results
																			Curve Name	Curve Formula	A	B	C	D	R2	Fit F Prob
	Curve Name	Curve Formula	A	B	C	D	R2	Fit F Prob											StdCurve	Y = (A-D)/(1+(X/C)^B) + D	0.105	1.6	1010	3.14	1	?????
	StdCurve	Y = (A-D)/(1+(X/C)^B) + D	0.113	2.22	515	5.16	1	?????
	Aβ40				Aβ42
WT-L	227.4	221.2	232.6	225.2	221.8	225	222.73	217.308
WT-H	227	220.8	232.2	224.8	223.4	224.65	221.3	219.308
S169L	54.46	53.6	54.86	54	97.12	99.36	101.396	94.72
S170F	78.64	79.4	81	77.96	74.16	75.8	75.3	73
G378E	22.46	23	24.04	21.78	28.5	29.2	29.8	27
F386S	116.72	117.8	119.2	115.308	169.52	169.16	172.6	164.72
A431E	0	0	0	0	33	32.2	31.4	34.6
A434T	0	0	0	0	61.16	61.8	63.96	58.2
