# Supplementary material for: Alzheimer-mutant γ-secretase complexes stall amyloid β-peptide production
Source: eLife. 2025 Feb 11;13:RP102274. doi: 10.7554/eLife.102274 (PMC11813224; doi:10.7554/eLife.102274)
Supplement: Figure 4—figure supplement 1—source data 1. [file elife-102274-fig4-figsupp1-data1.xlsx]

## Sheet: Figure S5A
WT	S169L	S170F	G378E	F386S	A431E	A434T
217.01	169.681	130.937	153.703	161.652	72.7	106.094
251.846	166.118	116.275	99.045	151.25	51.406	112.613
287.628	164.882	179.493	121.205	133.655	103.75	110.853
257.359	208.143	164.672	119.734	138.183	97.49	107.1
219.808	185.089	157.422	183.922	152.9	97.824	94.885
269.958	174.288	107.212	177.5	125.103	88.281	104.065
205.603	91.5332	144.4	127.573	126.857	142.088	86.4
129.354	175.105	196.641	211.719	126.812	154.135	95.727
168.771	163.322	144.266	188.783	120.305	100.265	144.045
182	147.052	223.033	153.983	140.464	122.458	170.136
130.077	113.784	264.899	132.923	198.028	171.7	148.5
124.708	211.792	218.938	132.647	208.966	142.622	246.534
67.485	134.508	102.643	184.354	152.609	98.932	247.619
78.8483	125.492	168.227	158.2	125.788	60.027	284.323
67.7083	107.594	134.607	177.175	126.306	131.294	272.45
62.718	90.2648	259.152	228.482	125.302	132.692	215.404
74.5127	156.675	250.76	265.029	151.017	270.5	195.167
85.9683	191.772	242.967	259.955	212.643	172.971	184.964
105.859	163.195	170.943	295.611	171.294	172.412	223.765
142.042	144.359	172.846	281.536	154.619	235.344	189.838
106.3	64.2905	158.786	227.25	129.557	220.477	187.375
76.2167	54.5962	120.157	188.872	119.869	193.438	79.583
68.9167	214.021	113.595	123.523	216.577	197.623	144.5
83.423	192.478	196.8	124.721	185.512	154.033	105.438
79.2707	159.769	119.087	103.286	257.883	178.802	172.405
91.2293	115.39	97.808	108.351	263.145	221.098	174.688
108.141	120.331	101.153	114.312	241.75	136.147	190.429
87.9873	174.625	112.556	133.246	133.529	76.879	141.846
237.492	175.432	146.058	176.784	157.863	76.25	162.625
279.083	64.5888	165.071	129.208	134.57	86.647	140.031
267.167	190.333	143.082	122.6	141.117	81.062	136
245.139	192.948	169.703	167.343	136.544	151.167	121.095
221.038	122.284	228.583	159.917	165.448	138.594	130.1
223.508	110.594	141.078	121.771	135.068	358	145.818
230.254	116.721	200.594	100.643	115.161	268.312	124.938
178.208	82.2595	162.054	146.125	116.8	296.864	90.938
232.729	145.821	143.062	175.405	213.103	159.812	159.919
211.882	177.859	137.216	238.189	117.3	281.683	246.645
117.111	174.672	140.814	277.382	114.139	215.953	271.906
120.167	181.219	126.719	229.449	159.213	194.462	286.667
117.952	205.662	259.741	167.577	204.133	247.892
74.354	218.213	185.313		199.238	260.431
105.972	134.859	126.724			95.262
	189.169	103.747
	204.012
	233.422
	163.815

## Sheet: Figure S5C
C99-720
pc	pc	WT	S169L	S170F	G378E	F386S	A431T	A434T
0	0.704206	1	0.800195	0.863818	0.662257	0.798688	1.08872	0.762795
0.003589	1.04424	1	0.983844	1.07179	0.701415	1.15412	0.973442	0.743091
0.040683	0.961349	1	0.888889	0.96988	0.898037	0.982066	1.18687	0.957019
PSEN1 full length
pc	pc	WT	S169L	S170F	G378E	F386S	A431T	A434T
0.19331	0.26781	1	1.01978	2.43204	2.99838	0.601331	3.11287	5.83668
0	0	1	0.286064	1.99759	6.52707	0.431266	5.43191	3.56882
0.005581	0.000732	1	0.549107	1.09089	2.12617	0.579365	2.25253	0.764648
PSEN1 CTF
pc	pc	WT	S169L	S170F	G378E	F386S	A431T	A434T
0.00493	0.200676	1	1.11056	1.16952	0.89648	0.647441	1.19323	1.28686
0.073465	0.078209	1	0.737812	1.20622	1.37168	0.361902	0.829389	0.399223
0.0012393	0.005821	1	0.53184	0.789421	0.782519	0.616795	0.792846	0.493825
