# Supplementary material for: Alzheimer-mutant γ-secretase complexes stall amyloid β-peptide production
Source: eLife. 2025 Feb 11;13:RP102274. doi: 10.7554/eLife.102274 (PMC11813224; doi:10.7554/eLife.102274)
Supplement: Figure 4—source data 1. [file elife-102274-fig4-data1.xlsx]

## Sheet: Figure 4C
WT	S169L	S170F	G378E	F386S	A431E	A434T
2053.92	2162.43	1540	2027.48	2336.1	727.2	1494.51
1974.86	2158.65	1307.67	2336.13	2550.6	1200.77	2364.23
2295.23	2336.52	1548.14	767.4	2179.05	2088.08	1165.3
2100.42	2083.81	963.08	614.17	2272.69	1944.7	1284.92
2152.96	2112.68	1646.82	831.78	1870.74	1616.08	775.9
1912.18	1613.77	1655.63	1783.73	1854.6	1923.12	1820.52
2260.55	2030.49	1933.18	1885.45	2362.33	2353.76	1695.69
2494.09	1434.78	1854.96	1937.5	2282.05	2393.25	2086.36
2449.22	1853.5	1022.23	1828.01	1963.05	2514.25	1888.13
2389.89	1996.54	1040.57	2018.54	2090.9	2113.84	2135.65
2257.52	1722.69	1948.77	2439.84	2413.37	2437.61	1475.87
1697.93	2031.87	2338.74	2142.33	1701.5	1463.78	2257.22
2050.62	1920.32	1171.02	2074.38	1675.69	1482.56	2014.87
2713.61	1754.76	2272.01	2248.76	2230.28	1541.9	2017.2
2519.88	2016.36	1687.24	1178.23	2070.08	1376.22	1371.38
2181.7	2049.09	1426.47	1900.9	2146.86	1378.63	2306.54
2415.78	1864.65	2048.35	1829.89	2282.41	1965.36	2134.24
2294.78	2020.38	2416.66	1601.61	1830.65	2104.29	2056.61
2243.76	2150.64	1973.66	1591.17	1864.37	1831.27	1815.41
1996.1	1656.01	1530.18	2160.22	2056.81	1973.52	1967.48
2564.05	2166.67	1500	2105.38	2085.49	1496.35	2162.56
1770.64	1814.62	2065.65	2404.78	2339.92	2131.25	2232.72
1838.14	2375.55	1500.11	2209.97	2464.57	2232.65	1314.55
1899.63	2035.11	2514.24	1803.37	2342.39	1978.31	1779.05
2310.99	2208.37	2130.25	2663.44	1746.62	2225.6	1979.38
2180.82	2247.78	1869.05	1861.94	2203.48	2412.25	2286.58
2338.5	1699.65	861.01	2093.9	2079.44	1845.29	2364.25
2190.4	2253.11	1816.45	2093.83	1967.96	1563.5	1693.29
1926.21	2005.7	1756.68	2055.45	2038.96	1872.31	1519.41
1974.99	1995.58	1937.89	1798.49	1611.86	1646.85	1646.41
2334.26	2215.76	1752.31	1724.62	1843.72	1764.02	1652.75
1892.25	1764.68	1622.66	1591.43	1936.91	1613.53	1712.04
2256.18	1992.51	1968.16	1868.32	1688.52	1965.26	1835.56
2334.97	1711.63	1887.59	2025.87	1909.76	1721.87	1638.62
2371.95	2299.87	2144.33	1589.18	1952.47	1962.32	1483.41
2054.73	1558.67	2031.08	1772.34	1977.53	1905.53	1635.75
2186.17	2240.01	1951.97	1871.07	2147.26	1958.56	1755.35
2252.33	2209.03	1972.07	1861.68	1968.29	1827.86	1858.65
2094.96	1964.7	1796.67	1914.6	2252.26	2028.54	1461.4
2115.87	1761.01	1728.63	1802.22	2214.02	1881.74	1672.76
1957.54	1580.15	1643.55	1776.33	2113.85	1836.54
2041.82	1864.77	1562.07		2241.08	2056.32
1866.16	2117.43	1945.17			1746.28
	1642.17	1647.29
	1984.25
	1658.28
	1474.28

## Sheet: Figure 4E
WT	F386S
1901.46	2028.5
1938.29	1963.59
1925.45	2146.77
1895.05	1993.43
1879	1970.17
2013.44	1758.56
1889.01	1874.14
1849.38	2067.64
1928.44	2013.5
2025.28	1924.14
1850.19	1897.64
1666.9	2226.89
1685.68	1984.55
1745.02	1986.88
1579.34	1341.06
1581.75	2276.22
2168.48	2103.91
2307.41	2026.29
2034.39	1785.09
2176.64	1937.15
1699.47	2132.24
2334.37	2202.39
2435.77	1284.22

## Sheet: Figure 4F
WT	F386S
1854.72	1905.3
2093.59	1889.18
1979.6	1921.48
2307.26	1885.15
1793.31	1892.98
1916.1	1836.54
2028.36	1690.95
2116.51	1763.14
2017.49	2075.59
2144.64	2004.76
2249.62	1636.13
1595.93	2187.75
1948.62	2118.36
2611.61	2296.43
2417.88	1203.21
2079.7	1941.2
2313.78	1868.68
2192.78	1635.56
2141.76	1624.9
1894.1	2206.02
2462.05	2150.01
